# Supplementary material
Source: publisher figshare collection journal article supplement (https://rs.figshare.com/ndownloader/files/14801540)
Supplement: Supplementary file 1 [file 14801540]

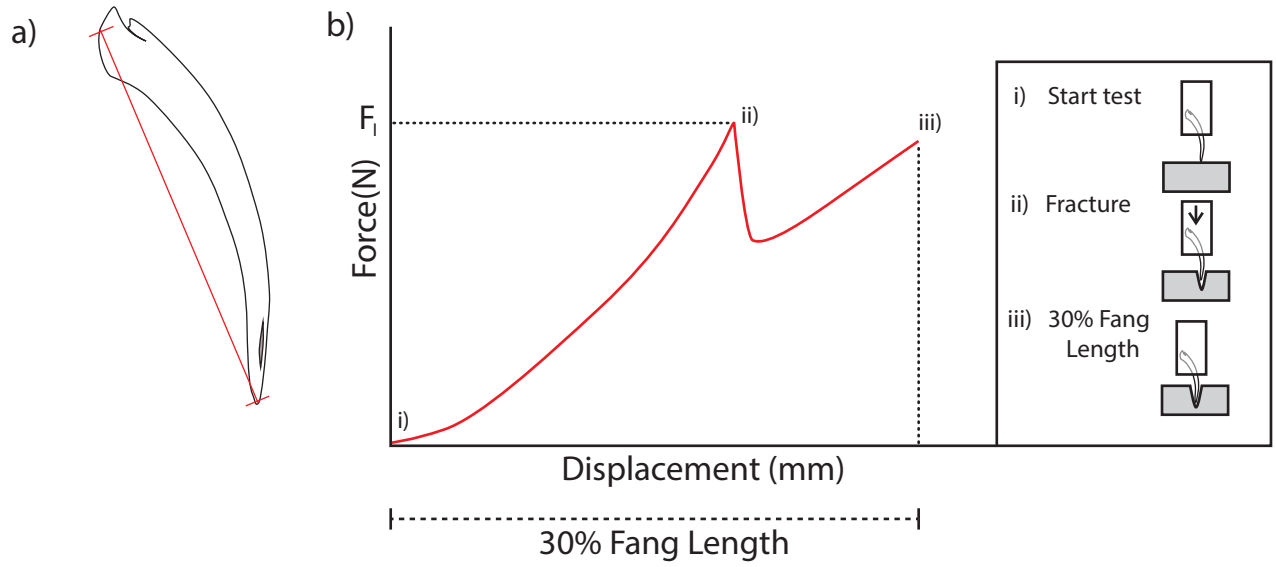

Supplemental Figure 1 - a) fang length was measured as a straight line from the base of the fang to the tip. b) Simplified Force x displacement curve showing position of the fang at i) the start of the test, ii) localized peak force associated with fracture, and iii) end of test when fang has traveled 30% fang length.
